# Supplementary figures and images for: Microfluidic generation of ATPS droplets by transient double emulsion technique
Source: Royal Society of Chemistry journal article supplement (doi:10.1039/d1lc00351h), 2021-01-01

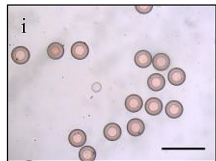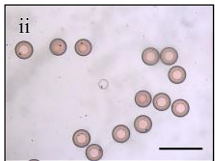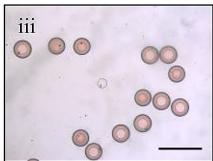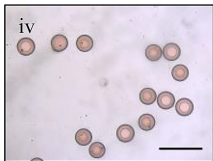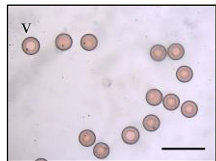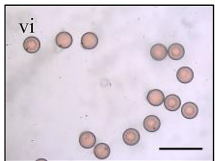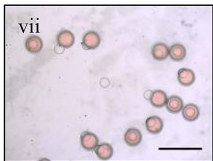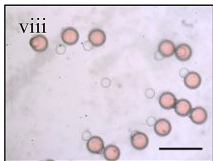

Supplement: d1lc00351h1.pdf [file d1lc00351h1.pdf]

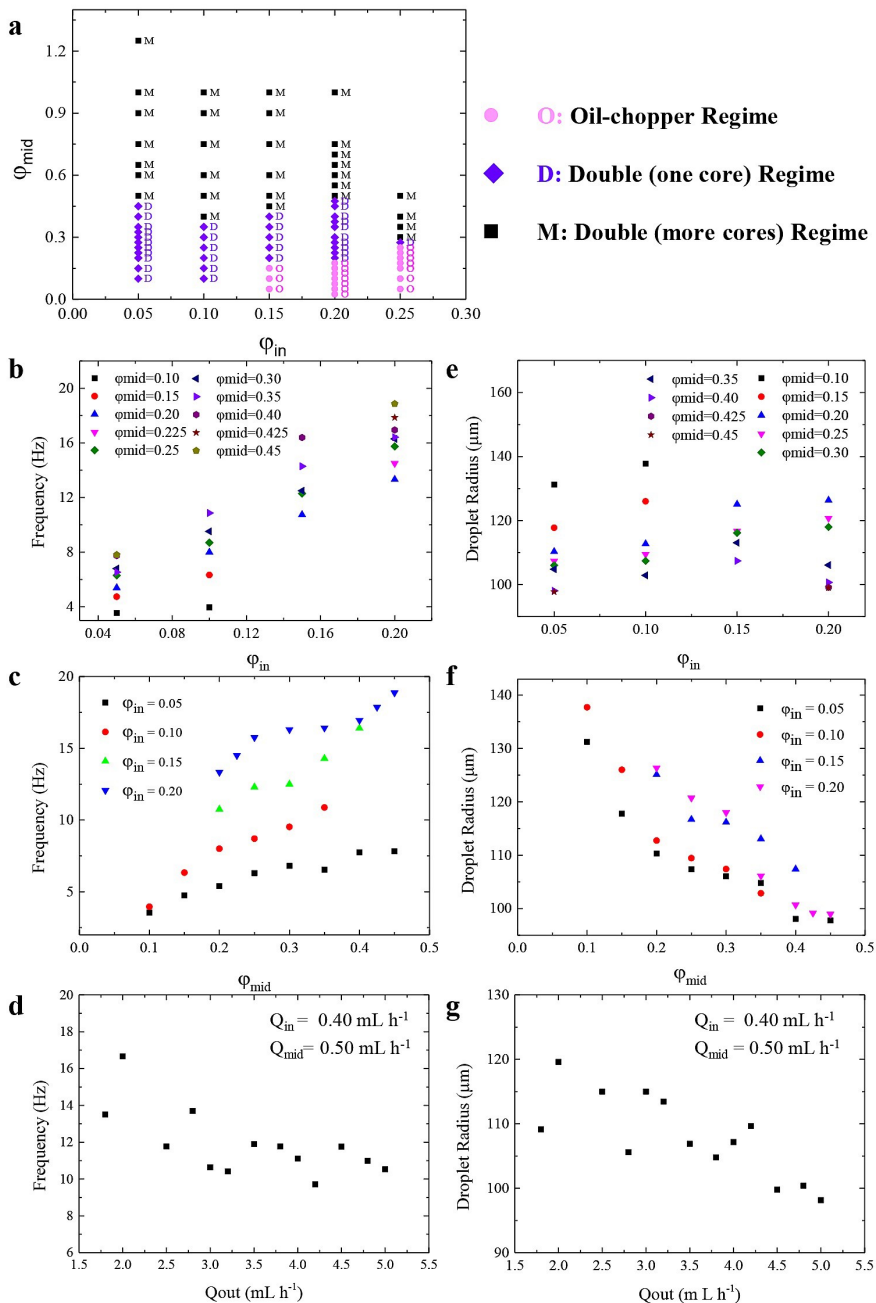

Supplement: d1lc00351h12.pdf [file d1lc00351h12.pdf]

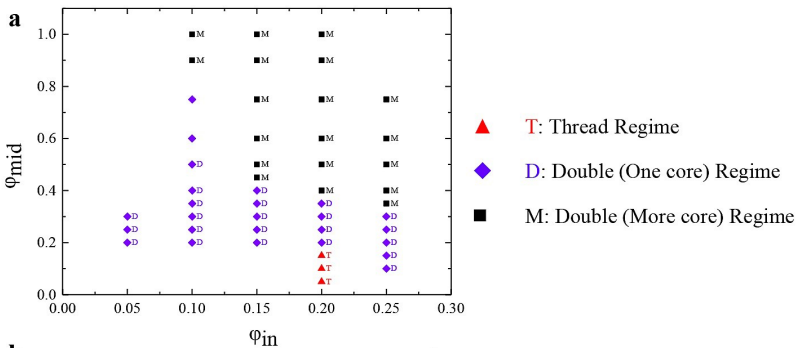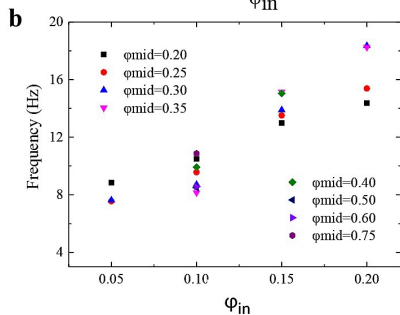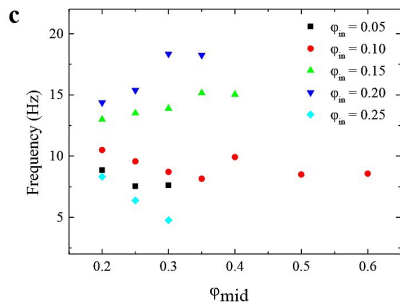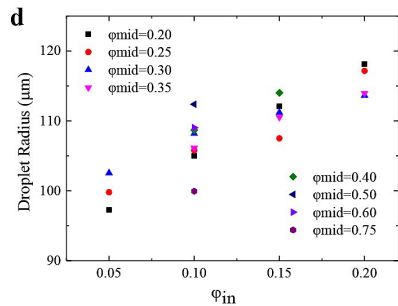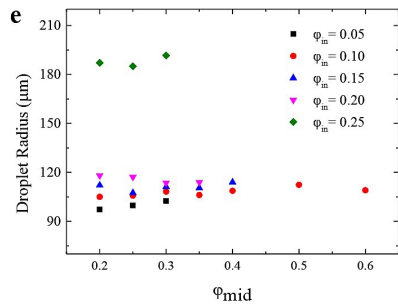

Supplement: d1lc00351h13.pdf [file d1lc00351h13.pdf]

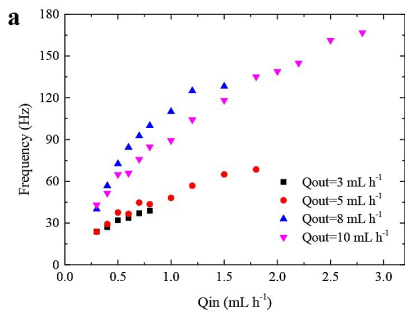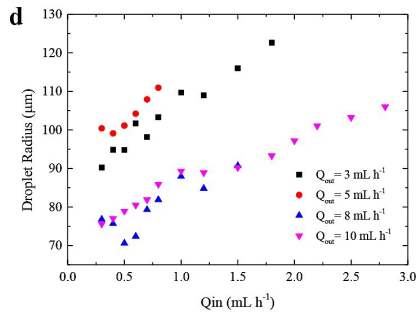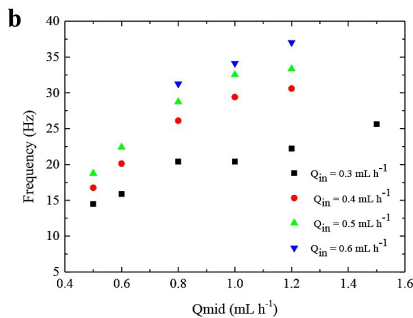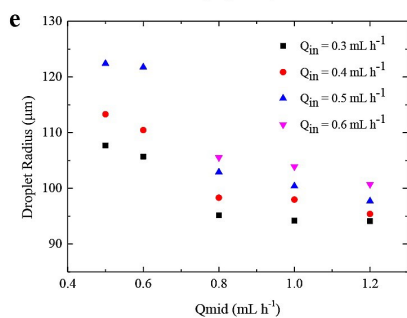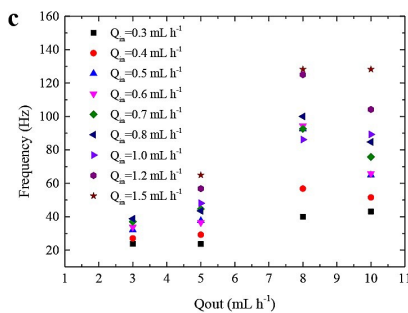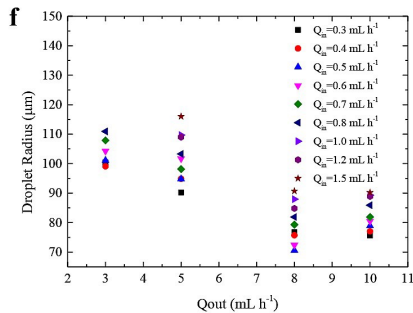

Supplement: d1lc00351h14.pdf [file d1lc00351h14.pdf]

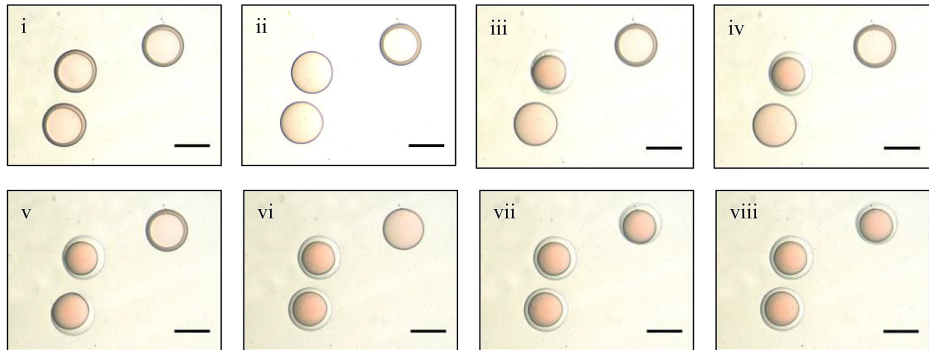

Supplement: d1lc00351h2.pdf [file d1lc00351h2.pdf]

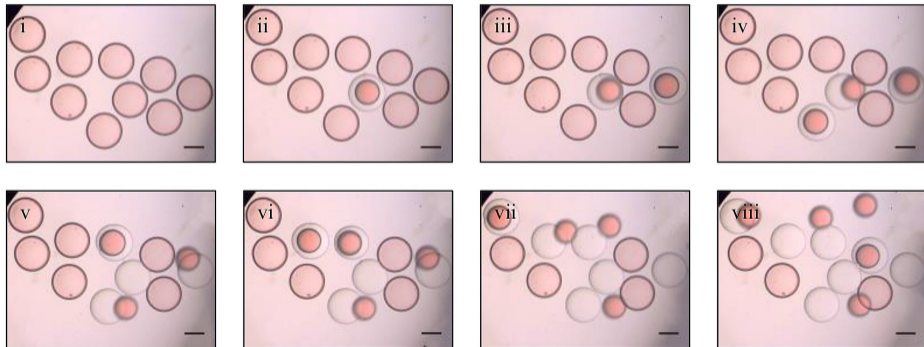

Supplement: d1lc00351h3.pdf [file d1lc00351h3.pdf]
